# Supplementary material
Source: publisher figshare collection journal article supplement (https://acs.figshare.com/ndownloader/files/5158873)
Supplement: Supplementary file 1 [file 5158873]

 
data_g7 
 
_audit_creation_method            SHELXL-97 
_chemical_name_systematic 
; 
 ? 
; 
_chemical_name_common             ? 
_chemical_melting_point           ? 
_chemical_formula_moiety          'C10 H8 N2 S'
_chemical_formula_sum 
 'C10 H8 N2 S' 
_chemical_formula_weight          188.24 
 
loop_ 
 _atom_type_symbol 
 _atom_type_description 
 _atom_type_scat_dispersion_real 
 _atom_type_scat_dispersion_imag 
 _atom_type_scat_source 
 'C'  'C'   0.0033   0.0016 
 'International Tables Vol C Tables 4.2.6.8 and 6.1.1.4' 
 'H'  'H'   0.0000   0.0000 
 'International Tables Vol C Tables 4.2.6.8 and 6.1.1.4' 
 'N'  'N'   0.0061   0.0033 
 'International Tables Vol C Tables 4.2.6.8 and 6.1.1.4' 
 'S'  'S'   0.1246   0.1234 
 'International Tables Vol C Tables 4.2.6.8 and 6.1.1.4' 
 
_symmetry_cell_setting            triclinic
_symmetry_space_group_name_H-M    'P -1'
 
loop_ 
 _symmetry_equiv_pos_as_xyz 
 'x, y, z' 
 '-x, -y, -z' 
 
_cell_length_a                    5.6280(11) 
_cell_length_b                    8.3590(17) 
_cell_length_c                    10.300(2) 
_cell_angle_alpha                 104.65(3) 
_cell_angle_beta                  105.30(3) 
_cell_angle_gamma                 98.33(3) 
_cell_volume                      440.39(15) 
_cell_formula_units_Z             2 
_cell_measurement_temperature     120(2) 
_cell_measurement_reflns_used     ? 
_cell_measurement_theta_min       3.78
_cell_measurement_theta_max       28.28
 
_exptl_crystal_description        prisms
_exptl_crystal_colour             yellow
_exptl_crystal_size_max           0.2
_exptl_crystal_size_mid           0.1
_exptl_crystal_size_min           0.1
_exptl_crystal_density_meas       ? 
_exptl_crystal_density_diffrn     1.420 
_exptl_crystal_density_method     'not measured' 
_exptl_crystal_F_000              196 
_exptl_absorpt_coefficient_mu     0.314 
_exptl_absorpt_correction_type    none
_exptl_absorpt_correction_T_min   ? 
_exptl_absorpt_correction_T_max   ? 
_exptl_absorpt_process_details    ? 
 
_exptl_special_details 
; 
 ? 
; 
 
_diffrn_ambient_temperature       120(2) 
_diffrn_radiation_wavelength      0.71073 
_diffrn_radiation_type            MoK\a 
_diffrn_radiation_source          'fine-focus sealed tube' 
_diffrn_radiation_monochromator   graphite 
_diffrn_measurement_device_type   KappaCCD
_diffrn_measurement_method        ? 
_diffrn_detector_area_resol_mean  ? 
_diffrn_standards_number          ? 
_diffrn_standards_interval_count  ? 
_diffrn_standards_interval_time   ? 
_diffrn_standards_decay_%         ? 
_diffrn_reflns_number             2091 
_diffrn_reflns_av_R_equivalents   0.0480
_diffrn_reflns_av_sigmaI/netI     0.0296 
_diffrn_reflns_limit_h_min        -7 
_diffrn_reflns_limit_h_max        7 
_diffrn_reflns_limit_k_min        -11 
_diffrn_reflns_limit_k_max        10 
_diffrn_reflns_limit_l_min        0 
_diffrn_reflns_limit_l_max        13 
_diffrn_reflns_theta_min          3.78 
_diffrn_reflns_theta_max          28.28 
_reflns_number_total              2091 
_reflns_number_gt                 1912 
_reflns_threshold_expression      >2sigma(I) 
 
_computing_data_collection        'Collect Package (Bruker Nonius)'
_computing_cell_refinement        'HKL'  
_computing_data_reduction         'HKL'
_computing_structure_solution     'SHELXS-97 (Sheldrick, 1990)' 
_computing_structure_refinement   'SHELXL-97 (Sheldrick, 1997)' 
_computing_molecular_graphics     ? 
_computing_publication_material   ? 
 
_refine_special_details 
; 
 Refinement of F^2^ against ALL reflections.  The weighted R-factor wR and 
 goodness of fit S are based on F^2^, conventional R-factors R are based 
 on F, with F set to zero for negative F^2^. The threshold expression of 
 F^2^ > 2sigma(F^2^) is used only for calculating R-factors(gt) etc. and is 
 not relevant to the choice of reflections for refinement.  R-factors based 
 on F^2^ are statistically about twice as large as those based on F, and R- 
 factors based on ALL data will be even larger. 
; 
 
_refine_ls_structure_factor_coef  Fsqd  
_refine_ls_matrix_type            full 
_refine_ls_weighting_scheme       calc  
_refine_ls_weighting_details 
 'calc w=1/[\s^2^(Fo^2^)+(0.0567P)^2^+0.2734P] where P=(Fo^2^+2Fc^2^)/3' 
_atom_sites_solution_primary      direct 
_atom_sites_solution_secondary    difmap 
_atom_sites_solution_hydrogens    geom 
_refine_ls_hydrogen_treatment     mixed 
_refine_ls_extinction_method      none 
_refine_ls_extinction_coef        ? 
_refine_ls_number_reflns          2091 
_refine_ls_number_parameters      150 
_refine_ls_number_restraints      0 
_refine_ls_R_factor_all           0.0403 
_refine_ls_R_factor_gt            0.0368 
_refine_ls_wR_factor_ref          0.0999 
_refine_ls_wR_factor_gt           0.0974 
_refine_ls_goodness_of_fit_ref    1.019 
_refine_ls_restrained_S_all       1.019 
_refine_ls_shift/su_max           0.005 
_refine_ls_shift/su_mean          0.001 
 
loop_ 
 _atom_site_label 
 _atom_site_type_symbol 
 _atom_site_fract_x 
 _atom_site_fract_y 
 _atom_site_fract_z 
 _atom_site_U_iso_or_equiv 
 _atom_site_adp_type 
 _atom_site_occupancy 
 _atom_site_symmetry_multiplicity 
 _atom_site_calc_flag 
 _atom_site_refinement_flags 
 _atom_site_disorder_assembly 
 _atom_site_disorder_group 
S1 S 0.51064(6) 0.30613(5) 0.06303(3) 0.01778(13) Uani 1 1 d . . . 
C21 C 0.7717(3) 0.31981(17) 0.21049(14) 0.0141(3) Uani 1 1 d . . . 
C31 C 1.0100(3) 0.42031(18) 0.23691(15) 0.0165(3) Uani 1 1 d . . . 
H31 H 1.039(4) 0.485(2) 0.173(2) 0.024(5) Uiso 1 1 d . . . 
C41 C 1.2032(3) 0.42713(18) 0.35613(15) 0.0177(3) Uani 1 1 d . . . 
H41 H 1.370(4) 0.495(3) 0.379(2) 0.025(5) Uiso 1 1 d . . . 
N51 N 1.1731(2) 0.34389(16) 0.44901(13) 0.0185(3) Uani 1 1 d . . . 
C61 C 0.9419(3) 0.25064(18) 0.42278(15) 0.0183(3) Uani 1 1 d . . . 
H61 H 0.921(4) 0.190(3) 0.489(2) 0.029(5) Uiso 1 1 d . . . 
C71 C 0.7359(3) 0.23438(17) 0.30588(15) 0.0160(3) Uani 1 1 d . . . 
H71 H 0.576(4) 0.168(3) 0.292(2) 0.026(5) Uiso 1 1 d . . . 
C22 C 0.6171(3) 0.22794(17) -0.08267(14) 0.0134(3) Uani 1 1 d . . . 
C32 C 0.8204(3) 0.14931(18) -0.07582(14) 0.0152(3) Uani 1 1 d . . . 
H32 H 0.917(4) 0.140(2) 0.007(2) 0.022(5) Uiso 1 1 d . . . 
C42 C 0.8786(3) 0.08692(18) -0.19910(15) 0.0166(3) Uani 1 1 d . . . 
H42 H 1.016(4) 0.037(2) -0.195(2) 0.021(5) Uiso 1 1 d . . . 
N52 N 0.7508(2) 0.09497(15) -0.32635(13) 0.0181(3) Uani 1 1 d . . . 
C62 C 0.5541(3) 0.16992(18) -0.33129(15) 0.0175(3) Uani 1 1 d . . . 
H62 H 0.466(4) 0.174(2) -0.421(2) 0.023(5) Uiso 1 1 d . . . 
C72 C 0.4818(3) 0.23877(18) -0.21378(15) 0.0160(3) Uani 1 1 d . . . 
H72 H 0.336(3) 0.293(2) -0.2255(19) 0.017(4) Uiso 1 1 d . . . 
 
loop_ 
 _atom_site_aniso_label 
 _atom_site_aniso_U_11 
 _atom_site_aniso_U_22 
 _atom_site_aniso_U_33 
 _atom_site_aniso_U_23 
 _atom_site_aniso_U_13 
 _atom_site_aniso_U_12 
S1 0.01404(19) 0.0261(2) 0.01255(19) 0.00457(14) 0.00291(13) 0.00725(14) 
C21 0.0137(6) 0.0148(6) 0.0113(6) 0.0019(5) 0.0022(5) 0.0034(5) 
C31 0.0166(6) 0.0173(6) 0.0149(6) 0.0057(5) 0.0043(5) 0.0017(5) 
C41 0.0164(7) 0.0161(6) 0.0175(7) 0.0039(5) 0.0028(5) 0.0010(5) 
N51 0.0206(6) 0.0183(6) 0.0141(6) 0.0040(5) 0.0017(5) 0.0050(5) 
C61 0.0237(7) 0.0185(7) 0.0143(6) 0.0069(5) 0.0059(5) 0.0063(5) 
C71 0.0167(7) 0.0152(6) 0.0157(6) 0.0038(5) 0.0063(5) 0.0021(5) 
C22 0.0131(6) 0.0124(6) 0.0128(6) 0.0032(5) 0.0029(5) 0.0010(5) 
C32 0.0144(6) 0.0173(6) 0.0121(6) 0.0049(5) 0.0009(5) 0.0037(5) 
C42 0.0152(6) 0.0171(6) 0.0170(7) 0.0044(5) 0.0046(5) 0.0041(5) 
N52 0.0216(6) 0.0177(6) 0.0136(6) 0.0043(5) 0.0050(5) 0.0017(5) 
C62 0.0213(7) 0.0162(7) 0.0122(6) 0.0051(5) 0.0013(5) 0.0011(5) 
C72 0.0151(6) 0.0150(6) 0.0152(6) 0.0051(5) 0.0004(5) 0.0025(5) 
 
_geom_special_details 
; 
 All esds (except the esd in the dihedral angle between two l.s. planes) 
 are estimated using the full covariance matrix.  The cell esds are taken 
 into account individually in the estimation of esds in distances, angles 
 and torsion angles; correlations between esds in cell parameters are only 
 used when they are defined by crystal symmetry.  An approximate (isotropic) 
 treatment of cell esds is used for estimating esds involving l.s. planes. 
; 
 
loop_ 
 _geom_bond_atom_site_label_1 
 _geom_bond_atom_site_label_2 
 _geom_bond_distance 
 _geom_bond_site_symmetry_2 
 _geom_bond_publ_flag 
S1 C22 1.7692(15) . ? 
S1 C21 1.7786(16) . ? 
C21 C71 1.3905(19) . ? 
C21 C31 1.394(2) . ? 
C31 C41 1.391(2) . ? 
C31 H31 0.98(2) . ? 
C41 N51 1.3476(19) . ? 
C41 H41 0.96(2) . ? 
N51 C61 1.337(2) . ? 
C61 C71 1.395(2) . ? 
C61 H61 0.96(2) . ? 
C71 H71 0.94(2) . ? 
C22 C32 1.3949(19) . ? 
C22 C72 1.397(2) . ? 
C32 C42 1.388(2) . ? 
C32 H32 0.92(2) . ? 
C42 N52 1.3419(19) . ? 
C42 H42 0.93(2) . ? 
N52 C62 1.345(2) . ? 
C62 C72 1.392(2) . ? 
C62 H62 0.94(2) . ? 
C72 H72 0.987(18) . ? 
 
loop_ 
 _geom_angle_atom_site_label_1 
 _geom_angle_atom_site_label_2 
 _geom_angle_atom_site_label_3 
 _geom_angle 
 _geom_angle_site_symmetry_1 
 _geom_angle_site_symmetry_3 
 _geom_angle_publ_flag 
C22 S1 C21 103.01(7) . . ? 
C71 C21 C31 118.73(13) . . ? 
C71 C21 S1 119.45(11) . . ? 
C31 C21 S1 121.75(11) . . ? 
C41 C31 C21 118.30(13) . . ? 
C41 C31 H31 121.2(12) . . ? 
C21 C31 H31 120.5(12) . . ? 
N51 C41 C31 123.86(14) . . ? 
N51 C41 H41 115.0(12) . . ? 
C31 C41 H41 121.1(12) . . ? 
C61 N51 C41 116.77(13) . . ? 
N51 C61 C71 123.89(13) . . ? 
N51 C61 H61 116.6(12) . . ? 
C71 C61 H61 119.5(12) . . ? 
C21 C71 C61 118.44(13) . . ? 
C21 C71 H71 120.3(13) . . ? 
C61 C71 H71 121.3(13) . . ? 
C32 C22 C72 118.11(13) . . ? 
C32 C22 S1 123.97(11) . . ? 
C72 C22 S1 117.85(11) . . ? 
C42 C32 C22 118.42(13) . . ? 
C42 C32 H32 119.7(12) . . ? 
C22 C32 H32 121.9(12) . . ? 
N52 C42 C32 124.60(13) . . ? 
N52 C42 H42 116.8(12) . . ? 
C32 C42 H42 118.6(12) . . ? 
C42 N52 C62 116.21(13) . . ? 
N52 C62 C72 123.86(13) . . ? 
N52 C62 H62 115.3(12) . . ? 
C72 C62 H62 120.8(12) . . ? 
C62 C72 C22 118.79(13) . . ? 
C62 C72 H72 119.2(11) . . ? 
C22 C72 H72 122.0(11) . . ? 
 
loop_ 
 _geom_torsion_atom_site_label_1 
 _geom_torsion_atom_site_label_2 
 _geom_torsion_atom_site_label_3 
 _geom_torsion_atom_site_label_4 
 _geom_torsion 
 _geom_torsion_site_symmetry_1 
 _geom_torsion_site_symmetry_2 
 _geom_torsion_site_symmetry_3 
 _geom_torsion_site_symmetry_4 
 _geom_torsion_publ_flag 
C22 S1 C21 C71 -123.66(12) . . . . ? 
C22 S1 C21 C31 59.26(13) . . . . ? 
C71 C21 C31 C41 1.5(2) . . . . ? 
S1 C21 C31 C41 178.65(11) . . . . ? 
C21 C31 C41 N51 -0.9(2) . . . . ? 
C31 C41 N51 C61 -0.2(2) . . . . ? 
C41 N51 C61 C71 0.7(2) . . . . ? 
C31 C21 C71 C61 -1.1(2) . . . . ? 
S1 C21 C71 C61 -178.31(10) . . . . ? 
N51 C61 C71 C21 0.0(2) . . . . ? 
C21 S1 C22 C32 17.60(13) . . . . ? 
C21 S1 C22 C72 -165.46(11) . . . . ? 
C72 C22 C32 C42 0.4(2) . . . . ? 
S1 C22 C32 C42 177.29(10) . . . . ? 
C22 C32 C42 N52 -0.7(2) . . . . ? 
C32 C42 N52 C62 0.2(2) . . . . ? 
C42 N52 C62 C72 0.7(2) . . . . ? 
N52 C62 C72 C22 -1.1(2) . . . . ? 
C32 C22 C72 C62 0.5(2) . . . . ? 
S1 C22 C72 C62 -176.64(10) . . . . ? 
 
_diffrn_measured_fraction_theta_max    0.950 
_diffrn_reflns_theta_full              28.28 
_diffrn_measured_fraction_theta_full   0.950 
_refine_diff_density_max    0.344 
_refine_diff_density_min   -0.279 
_refine_diff_density_rms    0.061 
